# Supplementary material for: Uncovering the basis of protein-protein interaction specificity with a combinatorially complete library
Source: eLife journal article supplement (doi:10.7554/elife.60924), 2020-10-27
Supplement: supp [file elife_poa_e60924_Figure_1_figure_supplement_1.pdf › elife_poa_e60924_Figure_1_figure_supplement_1.pdf]

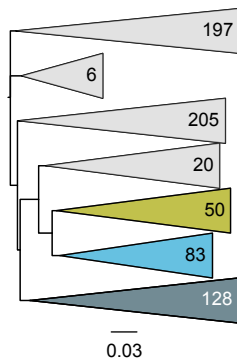

| Representative species                           | GenBank ID |
|--------------------------------------------------|------------|
| <i>Methylobacterium populi</i> BJ001 ParE        | ACB83275   |
| <i>Methylocystis</i> sp. SC2 ParE                | CCJ07499   |
| <i>Caulobacter</i> sp. K31 ParE                  | ABZ74025   |
| <i>Rhodopseudomonas palustris</i> BisB18 ParE    | ABD87886   |
| <i>Mesorhizobium opportunistum</i> WSM2075 ParE2 | AEH89588   |
| <i>Mesorhizobium opportunistum</i> WSM2075 ParE3 | AEH90009   |
| <i>Mesorhizobium opportunistum</i> WSM2075 ParE1 | AEH86956   |
