# Supplementary figures and images for: Uncovering the basis of protein-protein interaction specificity with a combinatorially complete library
Source: eLife journal article supplement (doi:10.7554/elife.60924), 2020-10-27

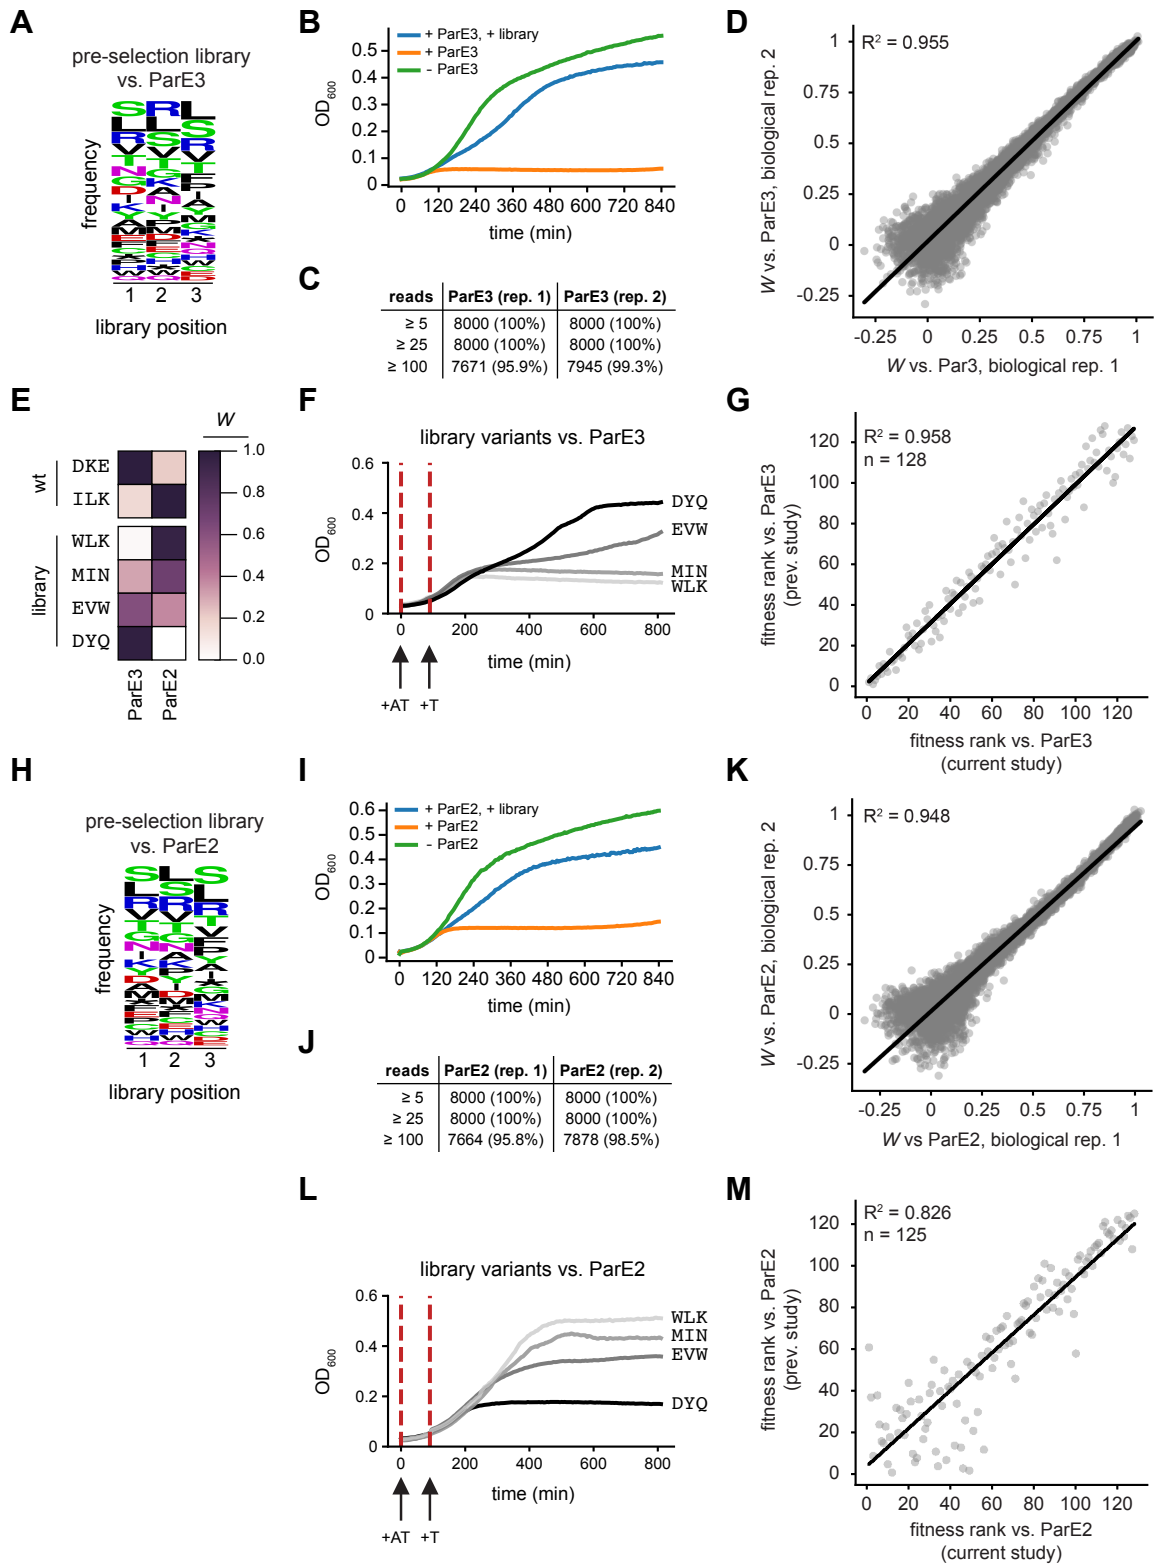

Supplement: supp [file elife_poa_e60924_Figure_2_figure_supplement_1.pdf › elife_poa_e60924_Figure_2_figure_supplement_1.pdf]

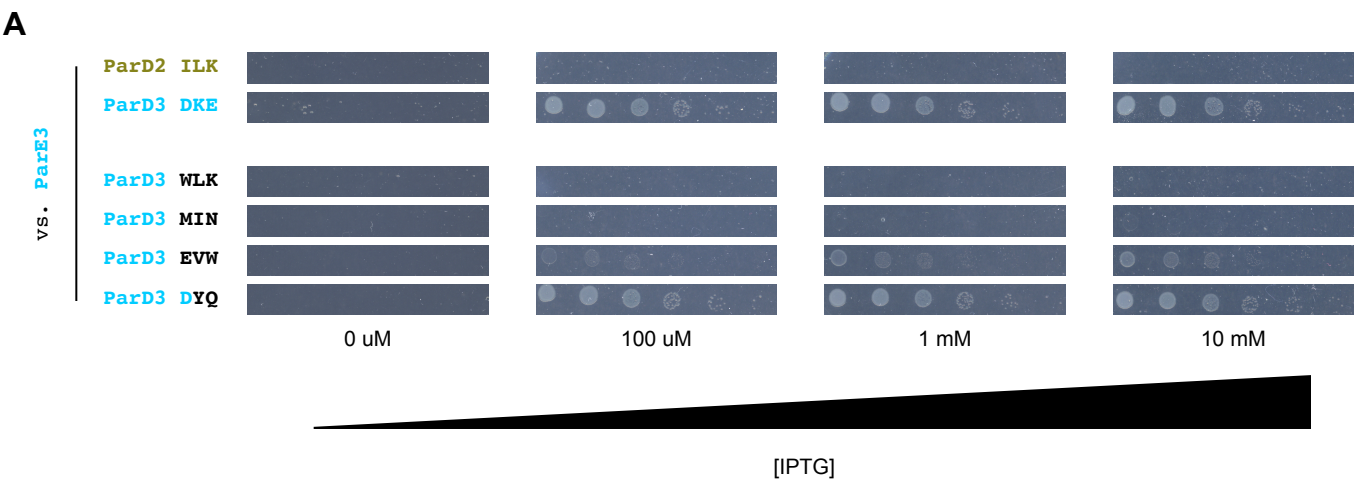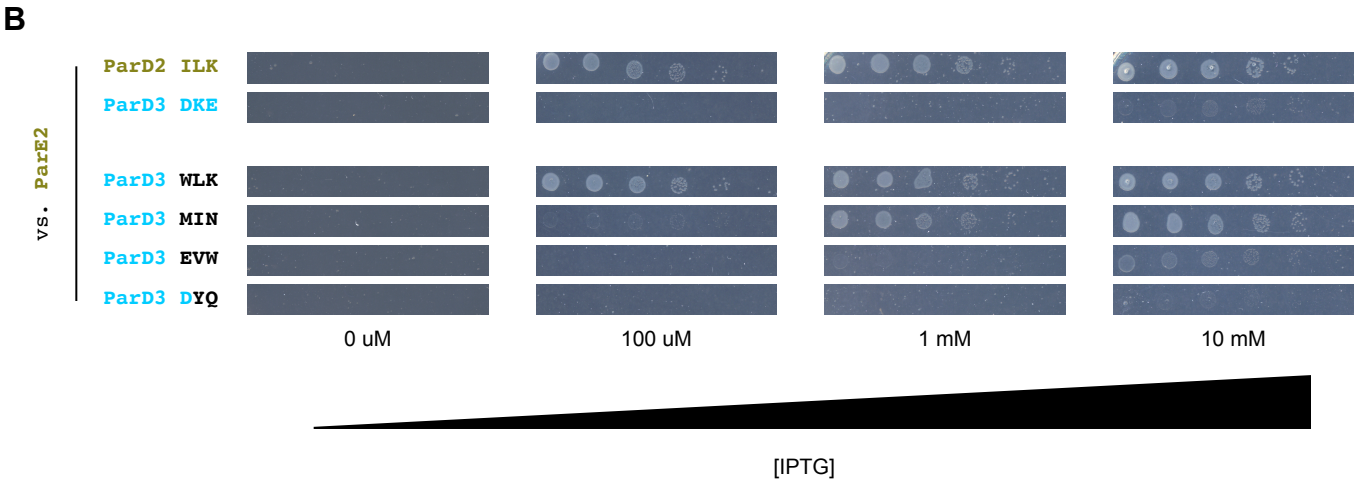

Supplement: supp [file elife_poa_e60924_Figure_2_figure_supplement_2.pdf › elife_poa_e60924_Figure_2_figure_supplement_2.pdf]

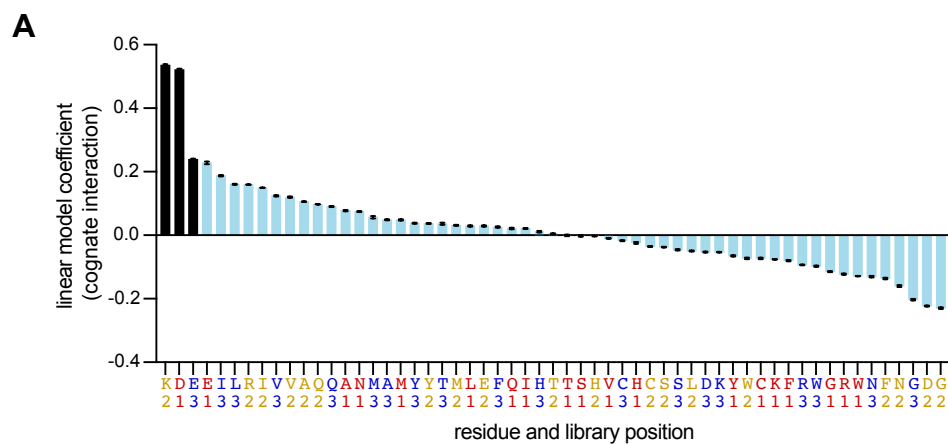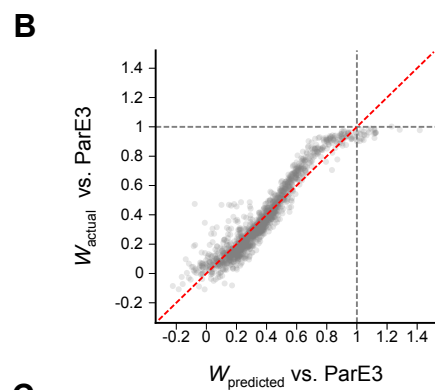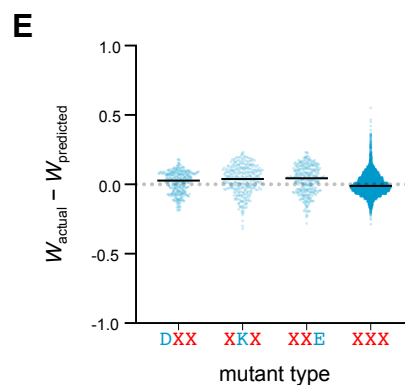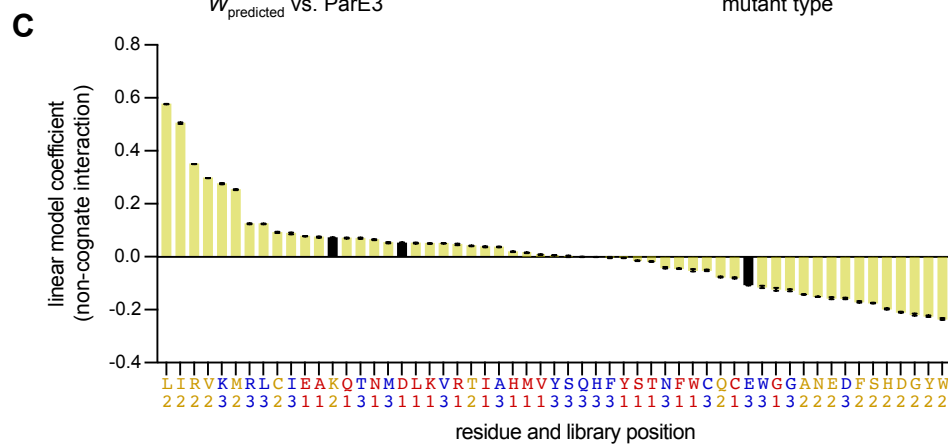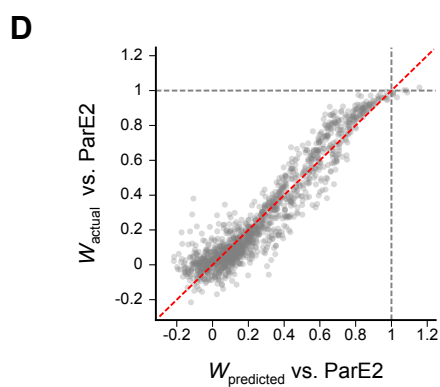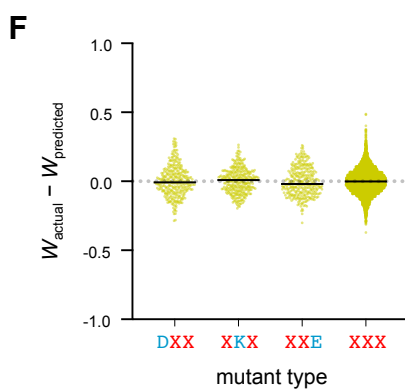

Supplement: supp [file elife_poa_e60924_Figure_3_figure_supplement_1.pdf › elife_poa_e60924_Figure_3_figure_supplement_1.pdf]

**A**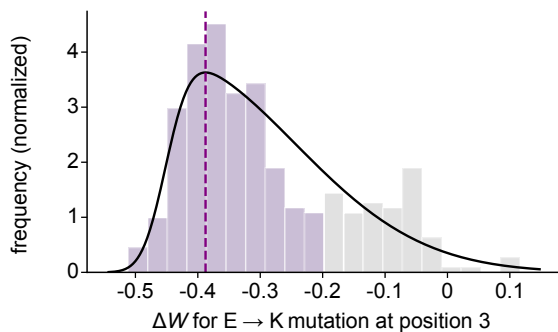**B**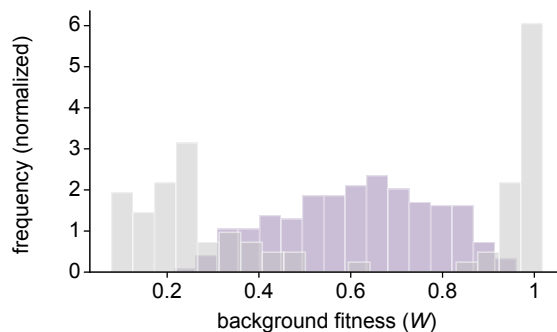**C**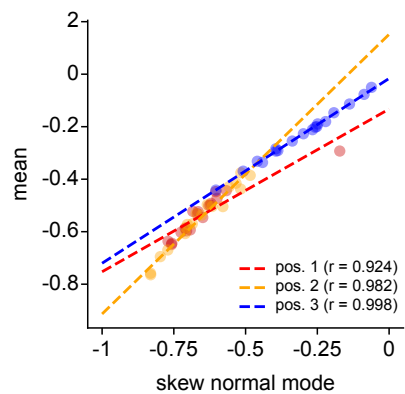**D**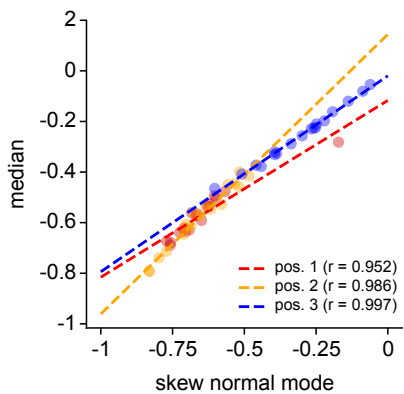**E**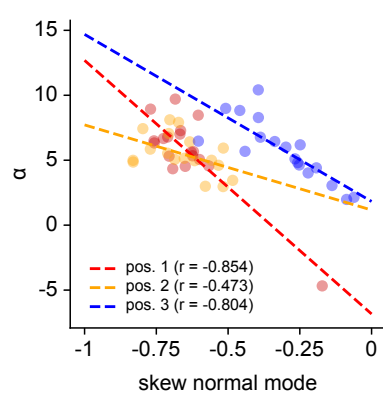**F**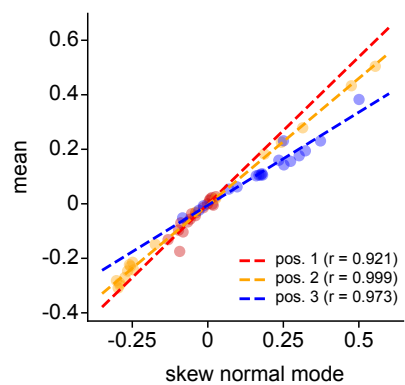**G**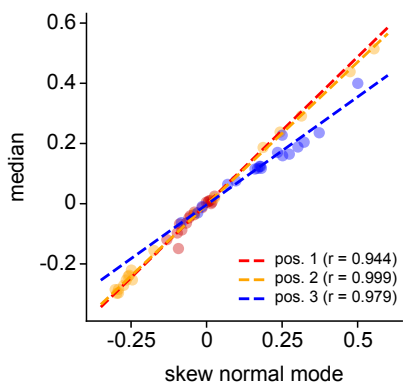**H**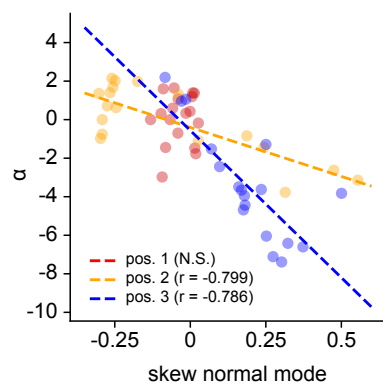

Supplement: supp [file elife_poa_e60924_Figure_4_figure_supplement_1.pdf › elife_poa_e60924_Figure_4_figure_supplement_1.pdf]

**A**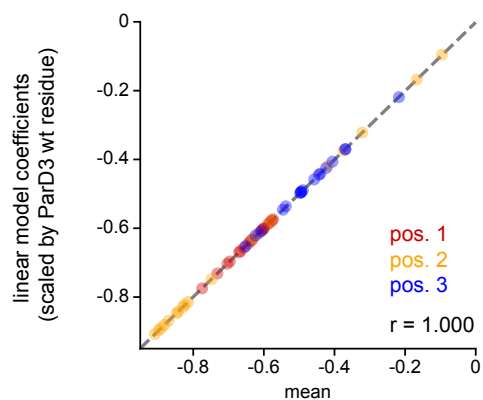**B**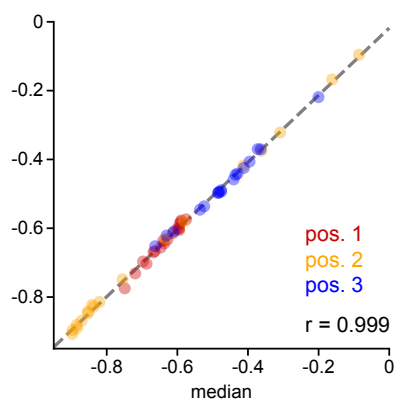**C**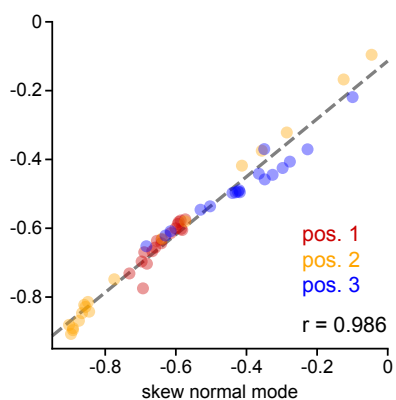**D**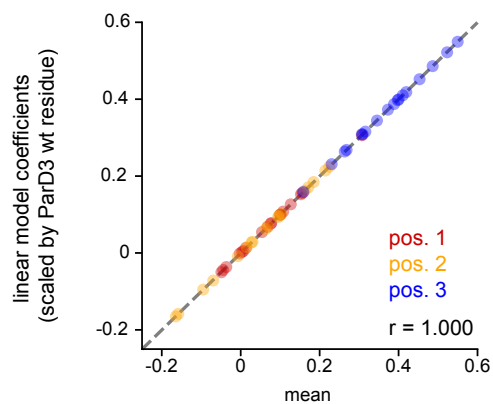**E**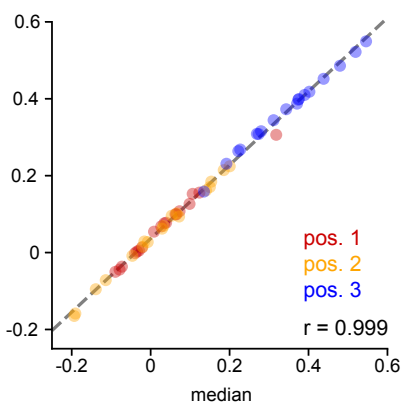**F**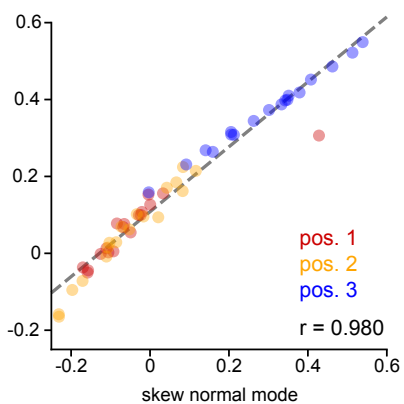

Supplement: supp [file elife_poa_e60924_Figure_4_figure_supplement_2.pdf › elife_poa_e60924_Figure_4_figure_supplement_2.pdf]

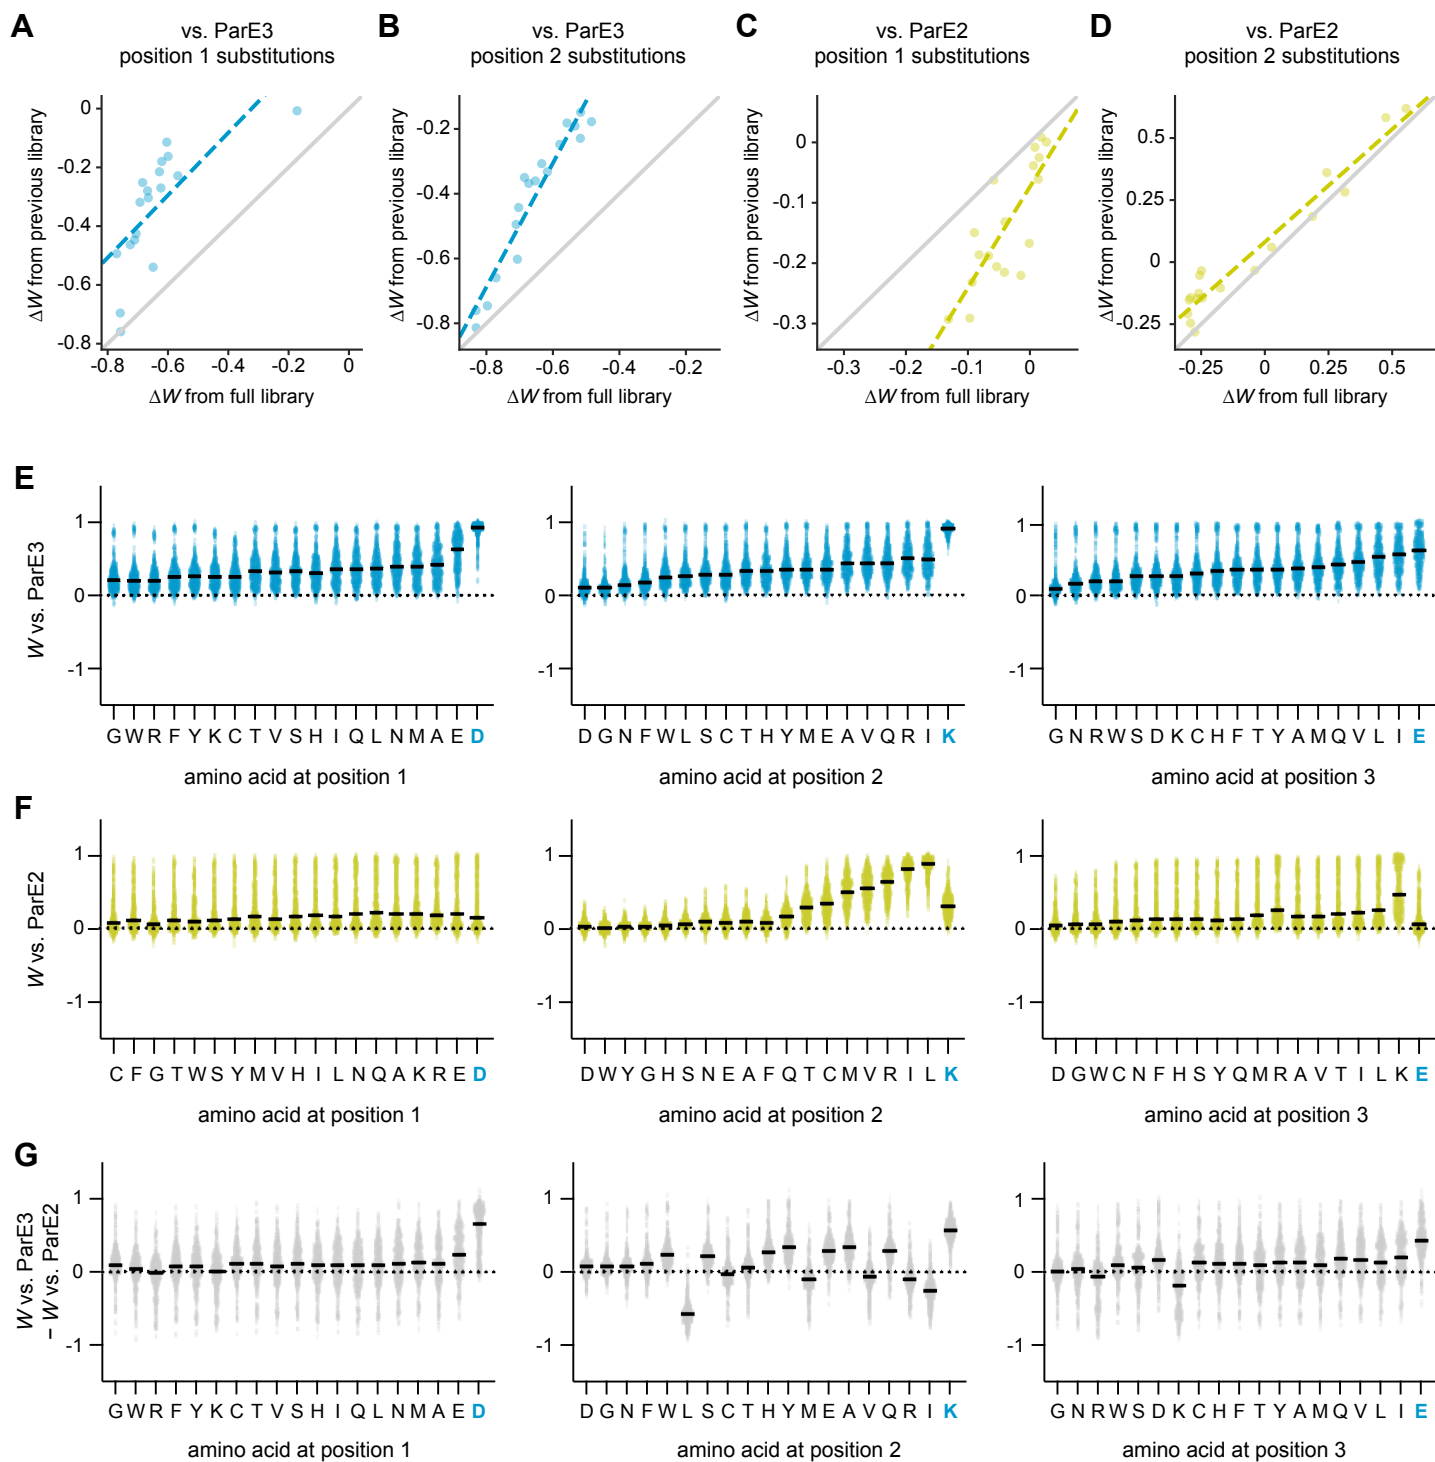

Supplement: supp [file elife_poa_e60924_Figure_4_figure_supplement_3.pdf › elife_poa_e60924_Figure_4_figure_supplement_3.pdf]

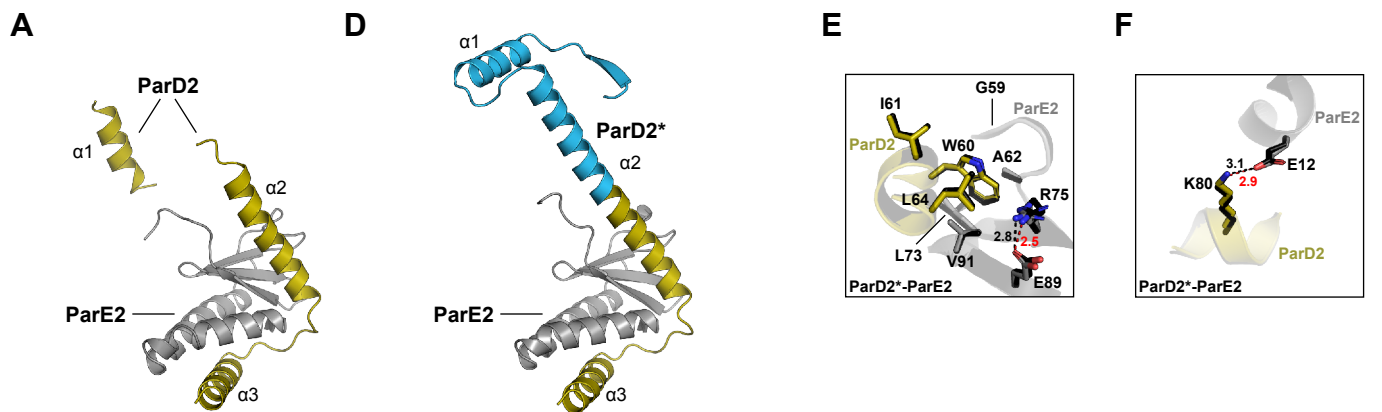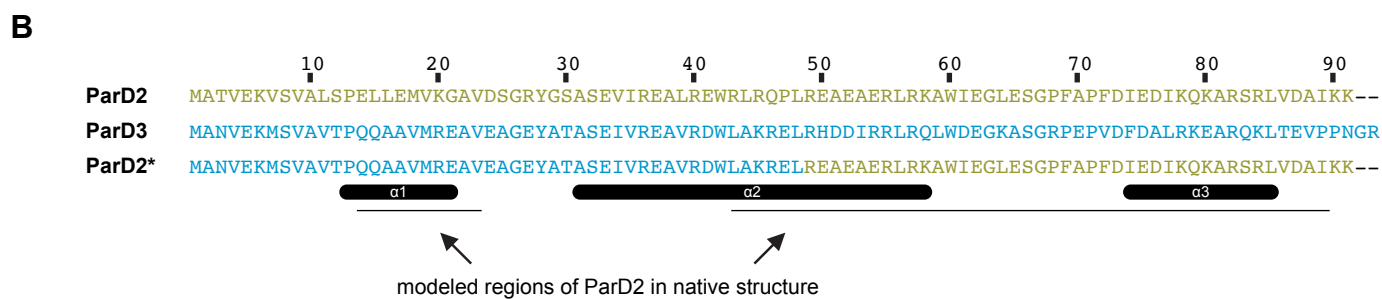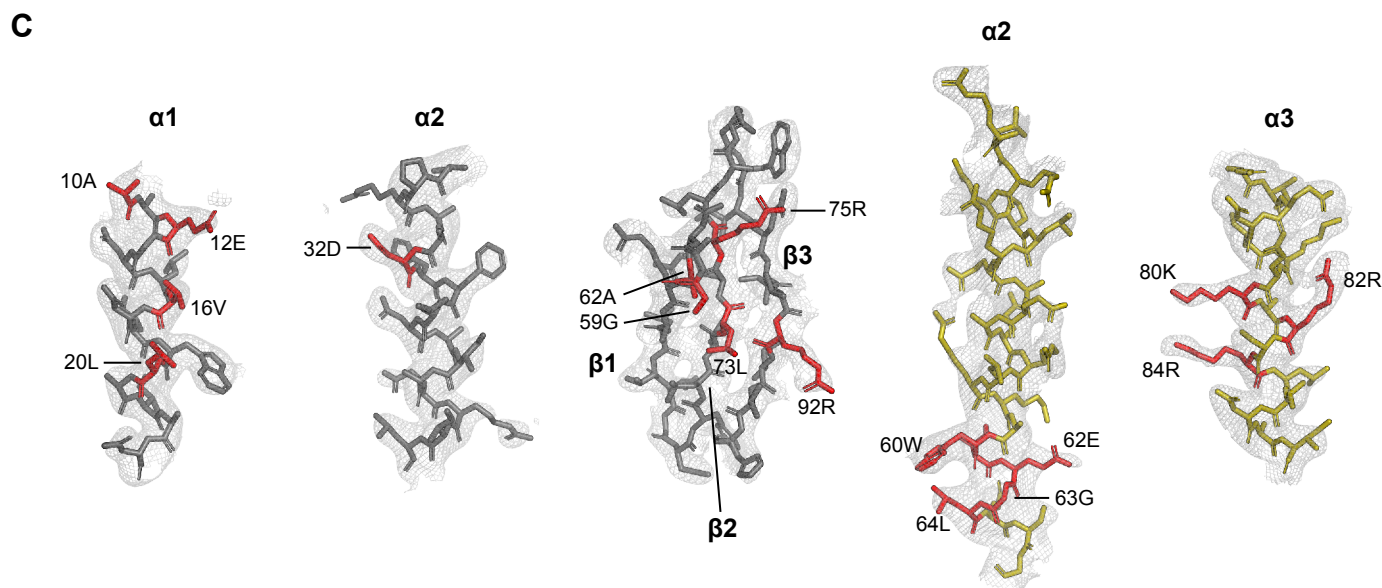

Supplement: supp [file elife_poa_e60924_Figure_5_figure_supplement_1.pdf › elife_poa_e60924_Figure_5_figure_supplement_1.pdf]
